# Supplementary material
Source: PubMed Central journal article supplement (PMC3234662)
Supplement: Supp_Data.pdf [file Supp_Data.pdf]

## Supplementary Methods

### Generation of *Prx3* knockout mice

The mouse genomic DNA obtained from 129/SvJ mouse J1 embryonic stem cells was screened by PCR using two-sets of primers to isolate a 2.7kb *NotI-XhoI* fragment derived from *Prx3* gene as the 5' short arm: the forward primer linked to *NotI* (5' gcgcccgcctgcatataagatcgtaggt 3'); the reverse primer linked to *XhoI* (5' ctcgagttatgcaagaggc 3') and a 4.6kb *XbaI-XbaI* fragment derived from *Prx3* gene as the 3' long arm: the forward primer (5' accttctagaacctggcttat 3'); the reverse primer (5' gcctcttcatctagataaaag 3'). We constructed a targeting vector for deleting a segment contained sequence of region of *Prx3* gene to exon 1 from exon 4 (~5.1 kb), using 5' 2.7 kb short arm fragment and 3' 4.6 kb long arm fragment ligated into the pPNT vector. A targeting vector was designed to replace a ~5.1 kb genomic fragment containing a segment of region of *Prx3* gene to exon1 from exon 4 and positive selection marker: PGK promoter and neomycin resistance gene. Negative selection marker: HSV-1 promoter driven thymidine kinase gene was appended to the construct to select against nonhomologous recombination. The targeting vector was linearized with *NotI* and electroporated into 129/SvJ mouse J1 embryonic stem cells. Clones resistant to G418 and gancyclovir were selected, and homologous recombination was confirmed by Southern blotting. The *Prx3* gene was modified in 2 of 466 clones screened. Two clones containing the targeted mutation were injected into C57BL/6 blastocysts, and these were subsequently transferred into pseudopregnant foster mothers. The resulting male chimeric mice were bred with C57BL/6 females to obtain heterozygous *Prx3* mice. Germ-line transmission of the mutant allele was verified by Southern blot analysis of tail DNA from F1 offspring with agouti coat color. Interbreeding of the heterozygous mice was performed to generate homozygous *Prx3*-deficient mice.

### 3T3-L1 adipocytes

3T3-L1 preadipocytes obtained from the ATCC (Manassas, VA) were maintained in DMEM (Invitrogen, Carlsbad, CA) supplemented with 10% FBS, 100 U/mL of penicillin, and 100 µg/mL of streptomycin (complete medium) at 37°C in humidified 5% CO<sub>2</sub> atmosphere. Two-day post-confluence cells (day 0) were incubated in the complete medium supplemented with 1 µM dexamethasone, 5 µg/mL insulin, and 10 µM rosiglitazone. At the end of day 2, the medium was replaced with complete medium supplemented with 5 µg/mL insulin. Starting on day 4, the medium was replaced with the complete medium every 2 days until further analysis. Preadipocytes and mature adipocytes were photographed with EVOS™ microscope (AMG, Mill Creek, WA) and lipid droplets in mature adipocytes were visualized using Oil Red O (Supplementary Fig. S9). For transfection of 3T3-L1 cells, siRNA oligonucleotides specific for *Prx3* mRNA were synthesized at ST Pharm (Seoul, Korea). The sequences are as follows: sense, 5'-UGACAAAGCCAAUGAAUUUdTdT-3'; antisense, 5'-AAAUUCAUUGGCUUUGUCAdTdT-3'. Scrambled siRNA (Bioneer, Daejeon, Korea) was used as a negative control. To induce gene silencing before differentiation, cells were grown until 60%–70% confluent and 50 nM siRNA was

transfected into 3T3-L1 cells using RNAiMAX (Invitrogen) according to the manufacturer's protocol. 24 h later, the medium was replaced with DMEM supplemented with 10% calf serum, and the cells were incubated for additional 24 h until they were confluent. The medium was then replaced with that containing the conventional hormonal stimuli (with 0.5 mM 3-isobutylmethylxanthine and without rosiglitazone). To induce gene silencing in mature 3T3-L1 adipocytes, differentiated 3T3-L1 adipocytes were trypsinized and seeded in 6-well plates with medium containing 100 nM siRNA and RNAiMAX and used 48 h after transfection. For *Prx3* over-expression, 5 µg pcDNA 3.1-*Prx3* was transiently transfected using Lipofectamine LTX Plus (Invitrogen) and used 48 h after transfection.

### 2D-PAGE

Cultured cells and isolated adipocytes were harvested and solubilized in buffer containing 8.4 M urea, 2.4 M thiourea, 5% CHAPS, 1.6% pharmalyte 5-7, 0.4% pharmalyte 3-10, 50 mM DTT, protease inhibitor cocktail, and 5 mM Na<sub>3</sub>VO<sub>4</sub>. Equal amounts of proteins (200 µg for cultured cells and 125 µg for isolated adipocytes) were separated, detected, and quantitatively analyzed as described previously (1, 3). The proteins, whose expression levels were altered by at least 1.5-fold in triplicate experiments, were chosen for further analysis.

### Protein identification using tandem mass spectrometry analysis

The protein spots separated on 2D-PAGE were excised, destained in solution containing 30 mM potassium ferricyanide/100 mM sodium thiosulfate, washed to remove the destaining reagent and digested with trypsin (Promega, Madison, WI) as described previously (3). Peptide sequencing was performed by nanoAcquity™ UPLC™/ESI-q-TOF tandem MS (SYNAPT™ HDMS™, Waters, London, UK) as described previously (1).

### Gene expression analysis

Total RNA was extracted from 3T3-L1 preadipocytes, mature adipocytes, and isolated adipocytes using Trizol (Invitrogen) according to the standard protocol. mRNA expressions were measured by real-time PCR using ABI7300 (Applied Biosystems, Carlsbad, CA) with 20 µL reaction volume consisting of cDNA transcripts, primer pairs, and SYBR Green PCR Master Mix (Applied Biosystems). Quantifications were normalized to 18S in each reaction. The sequences for the primers are listed in Supplementary Table S2.

### Western blot analysis

3T3-L1 cells or isolated adipocytes were lysed in TGN buffer (2), separated by SDS-PAGE and transferred to PVDF membrane for 45 min and probed with various antibodies (cofilin 1, pyruvate carboxylase, PCNA, PAI-1, prohibitin, GAPDH, and α-tubulins: Santa Cruz Biotechnology, Santa Cruz, CA; Prx1, Prx3, Prx5, and Prx3-SO<sub>3</sub>: AbFrontier, Seoul, Korea, Hsp70/Hsc70: Stressgen, San Diego, CA; Hsp60:

Epitomics, Burlingame, CA; adiponectin: Adipogen, Seoul, Korea; aP2, C/EBP $\alpha$ , and PPAR $\gamma$ : Cell Signaling Technology, Danvers, MA). The blots were detected using LAS-3000 (Fuji photo film, Tokyo, Japan).

#### *Histology and immunohistochemistry*

Epididymal adipose tissues from WT and Prx3 KO mice were fixed in 10% formalin, dehydrated, and embedded in paraffin. Five micron sections were used for hematoxylin and eosin (H&E) staining. For quantification, the number of adipocytes per microscope picture was divided by the area of the picture (mm<sup>2</sup>). For each mouse, four random pictures were used. For immunohistochemistry, anti-nitrotyrosine (1:100, Santa Cruz Biotechnology) and anti-Hsp 60 (1:100, Epitomics) antibodies were used. Stained sections were counterstained with Mayer's hematoxylin solution.

#### *Mitochondrial isolation*

Subcutaneous, epididymal, and omental fat pads of WT and Prx3 KO mice were homogenized, washed in 10 mM Tris-HCl, and lysed with 300 mM sucrose, and centrifuged at 700 g to remove nuclei, unbroken cells, and the lipid cake. Supernatant was centrifuged at 14,000 g to obtain mitochondria and the pellet was lysed with 2X Laemmli buffer for protein carbonylation assay.

#### *WAT analysis of db/db mice and human subjects*

RNA was extracted from epididymal fat pads of *db/m* and *db/db* mice. Heart, liver, kidney, and WAT of *db/m* and *db/db*

mice were lysed and separated by SDS-PAGE as described above. Human peri-renal fat tissues were obtained from redundant soft tissues attached to the extracted donor kidneys for 28 living donor kidney transplantation.

#### *Statistics*

Data are presented as mean  $\pm$  S.E. Mean values obtained from each group were compared by ANOVA with subsequent Fisher's significant difference method. Nonparametric analyses were also used where appropriate. *P* value of <0.05 was used as the criterion for a statistically significant difference.

#### **References**

1. Seo J, Jeong J, Kim YM, Hwang N, Paek E, and Lee KJ. Strategy for comprehensive identification of post-translational modifications in cellular proteins, including low abundant modifications: application to glyceraldehyde-3-phosphate dehydrogenase. *J Proteome Res* 7: 587–602, 2008.
2. Seo JB, Moon HM, Noh MJ, Lee YS, Jeong HW, Yoo EJ, Kim WS, Park J, Youn BS, Kim JW, Park SD, and Kim JB. Adipocyte determination- and differentiation-dependent factor 1/sterol regulatory element-binding protein 1c regulates mouse adiponectin expression. *J Biol Chem* 279: 22108–22117, 2004.
3. Song EJ, Yim SH, Kim E, Kim NS, and Lee KJ. Human Fas-associated factor 1, interacting with ubiquitinated proteins and valosin-containing protein, is involved in the ubiquitin-proteasome pathway. *Mol Cell Biol* 25: 2511–2524, 2005.

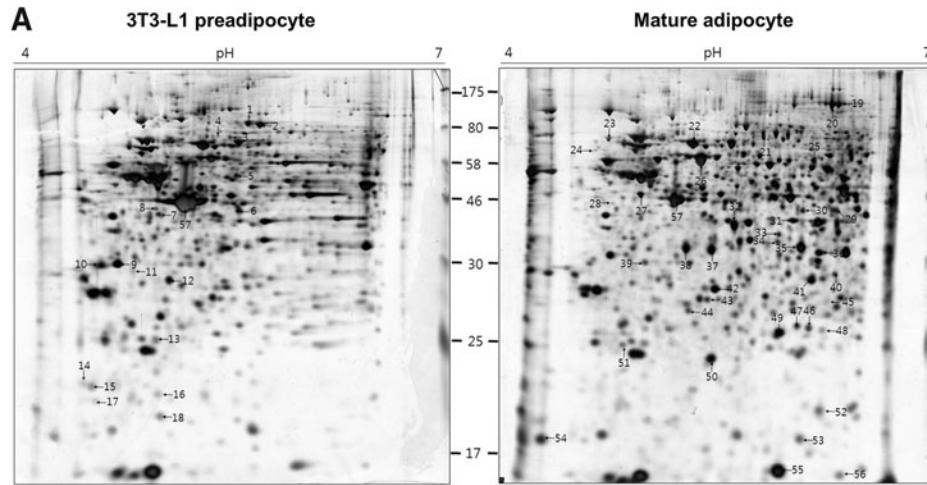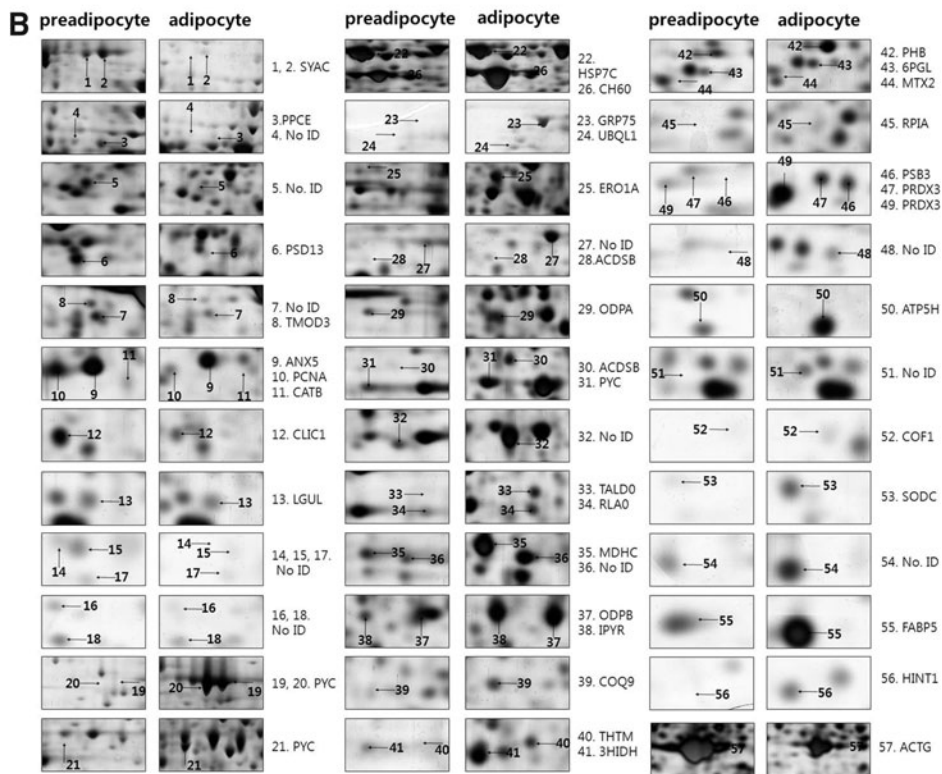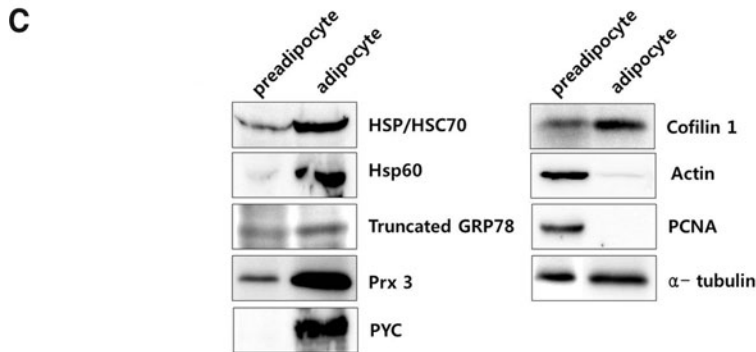

**SUPPLEMENTARY FIG. S1. Protein expression profiles of 3T3-L1 preadipocytes and differentiated mature adipocytes.** (A) Representative 2-DE gel images of 3T3-L1 preadipocytes and mature adipocytes. Cell lysates were separated on 2D-PAGE (pH 4–7), detected with silver staining, and semi-quantitatively analyzed with image analysis. Differentially expressed proteins were excised and analyzed by in-gel digestion and UPLC-ESI-q-TOF tandem MS. (B) Enlarged image of each spot identified by tandem MS. (C) Differentially expressed proteins were confirmed by Western blot analysis.

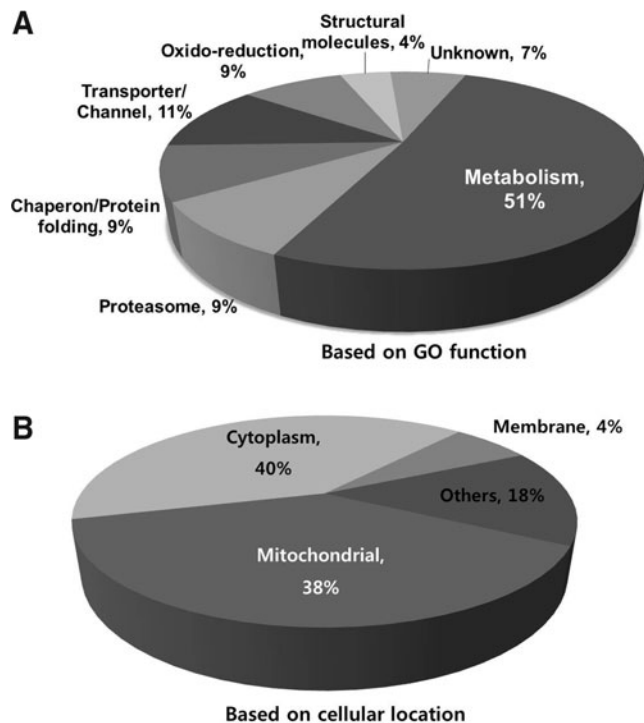

SUPPLEMENTARY FIG. S2. Identified proteins in pre-adipocytes and mature 3T3-L1 adipocytes were classified based on (A) biological function and (B) cellular location using gene ontology.

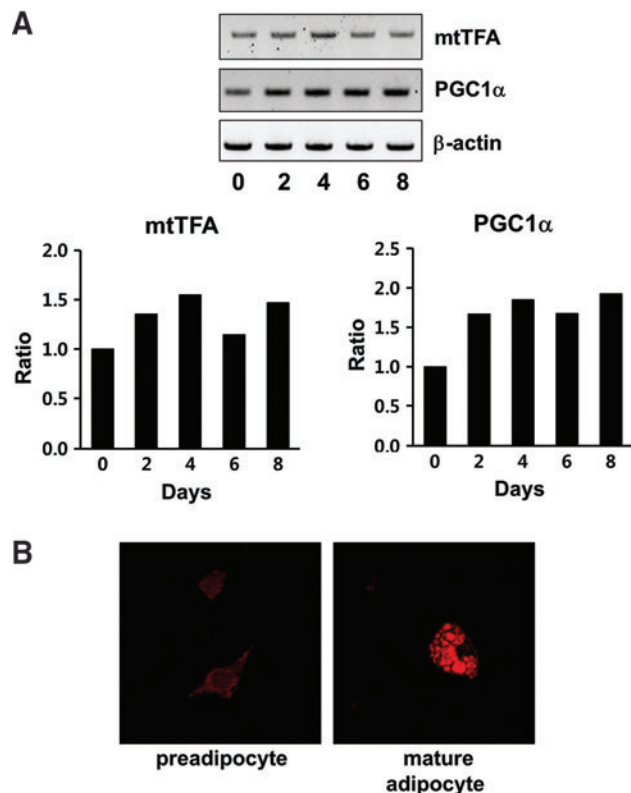

SUPPLEMENTARY FIG. S3. Mitochondrial biogenesis during 3T3-L1 adipocyte differentiation. (A) RT-PCR results of mtTFA and PGC1 $\alpha$  during 3T3-L1 differentiation.  $\beta$ -Actin was used as an internal control. (B) Mitochondria staining of 3T3-L1 preadipocytes and mature adipocytes were performed with MitoTracker Red CMS Ros and examined using a confocal microscope.

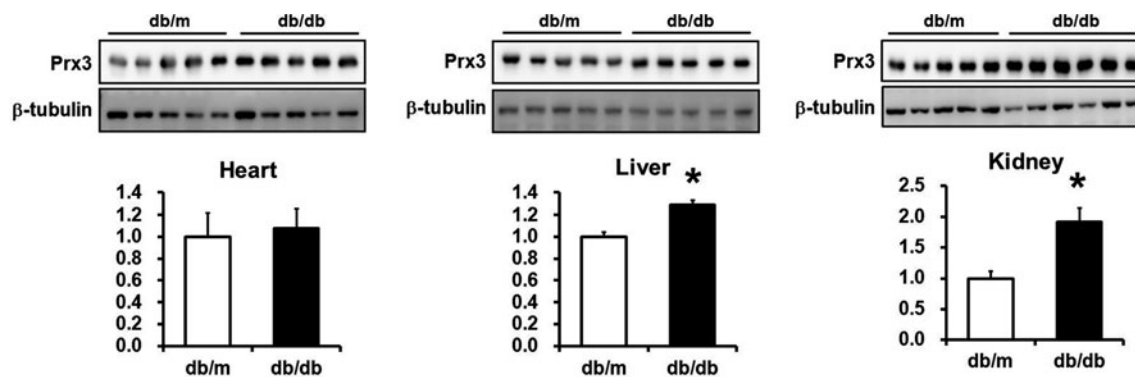

SUPPLEMENTARY FIG. S4. Prx3 is differentially expressed in various tissues. Prx3 protein expression levels in heart, liver, and kidney of *db/m* and *db/db* mice. Values were normalized to tubulin. Values are means  $\pm$  SE of 5–6 mice per group. \* $p < 0.05$  vs. *db/m*.

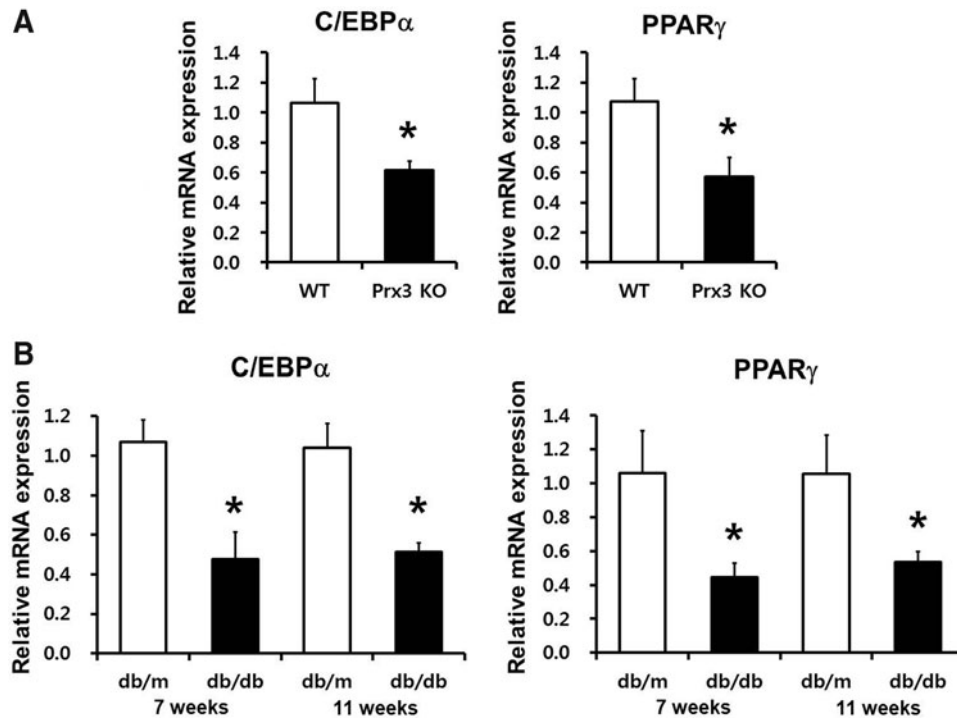

SUPPLEMENTARY FIG. S5. Adipogenic genes were downregulated in Prx3 KO mice and *db/db* mice adipocytes. C/EBP $\alpha$  and PPAR $\gamma$  levels were examined by real-time PCR in (A) WT and Prx3 KO mice, and (B) *db/m* and *db/db* mice white adipose tissues. Quantifications were normalized to 18S in each reaction. Values are means  $\pm$  SE of 4-5 mice per group. \* $p < 0.05$  vs. WT or *db/m*.

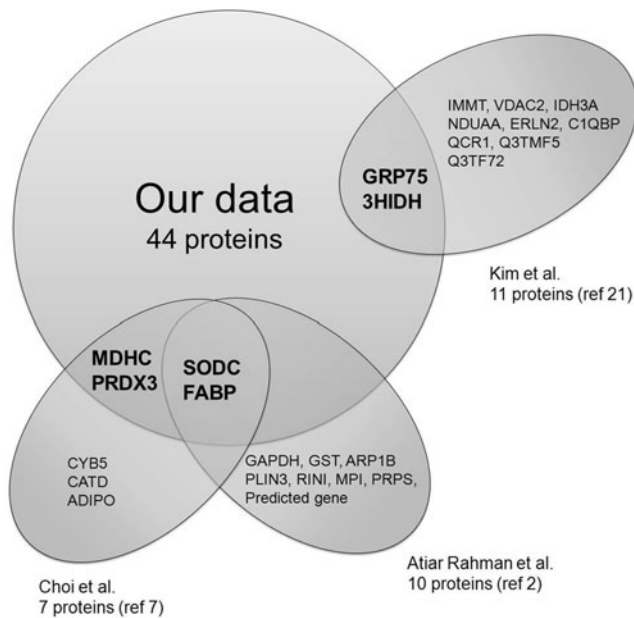

SUPPLEMENTARY FIG. S6. Venn diagram illustrating the overlap in proteins identified in adipogenic-differentiated cells in various proteomic methodologies.

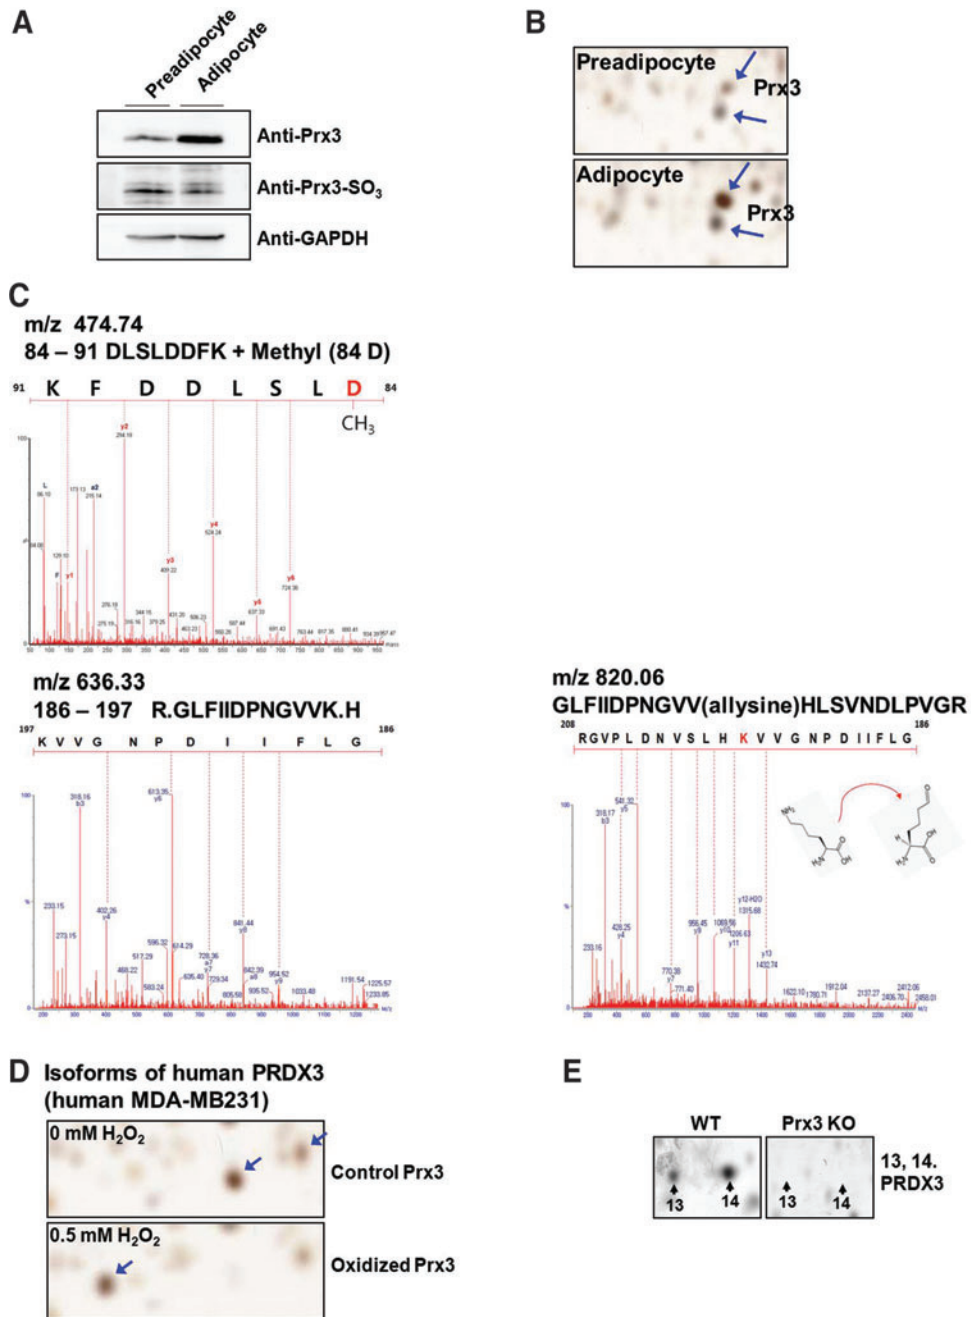

**SUPPLEMENTARY FIG. S7. Post-translational modification of Prx3.** (A) Prx3 expression and its oxidation product Prx3-SO<sub>3</sub> in preadipocytes and adipocytes were detected by Western analysis using anti-Prx3 and anti-Prx3-SO<sub>3</sub> antibodies. (B) Comparison of Prx3 spots between preadipocytes and adipocytes on 2D-PAGE. (C) MS/MS spectra of modified peptides of Prx3. (D) 2D-PAGE of control and oxidized Prx3 in human MDA-MB231 cells. (E) 2D profiling of Prx3 in WT and Prx3 KO mouse adipocytes. Spot 13 is oxidized Prx3, and spot 14 is control Prx3.

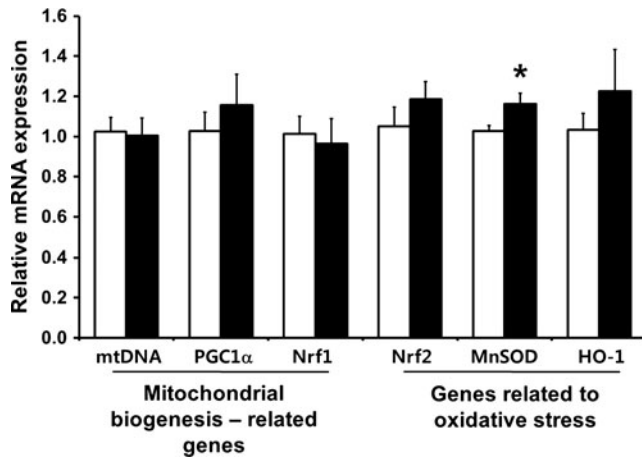

SUPPLEMENTARY FIG. S8. Liver mRNA levels were similar between wild-type and Prx3 KO mice. Genes related to mitochondrial biogenesis and oxidative stress were examined by real-time PCR. Quantifications were normalized to 18S in each reaction. Values are means  $\pm$  SE of 5–7 mice per group. \* $p < 0.05$  vs. WT.

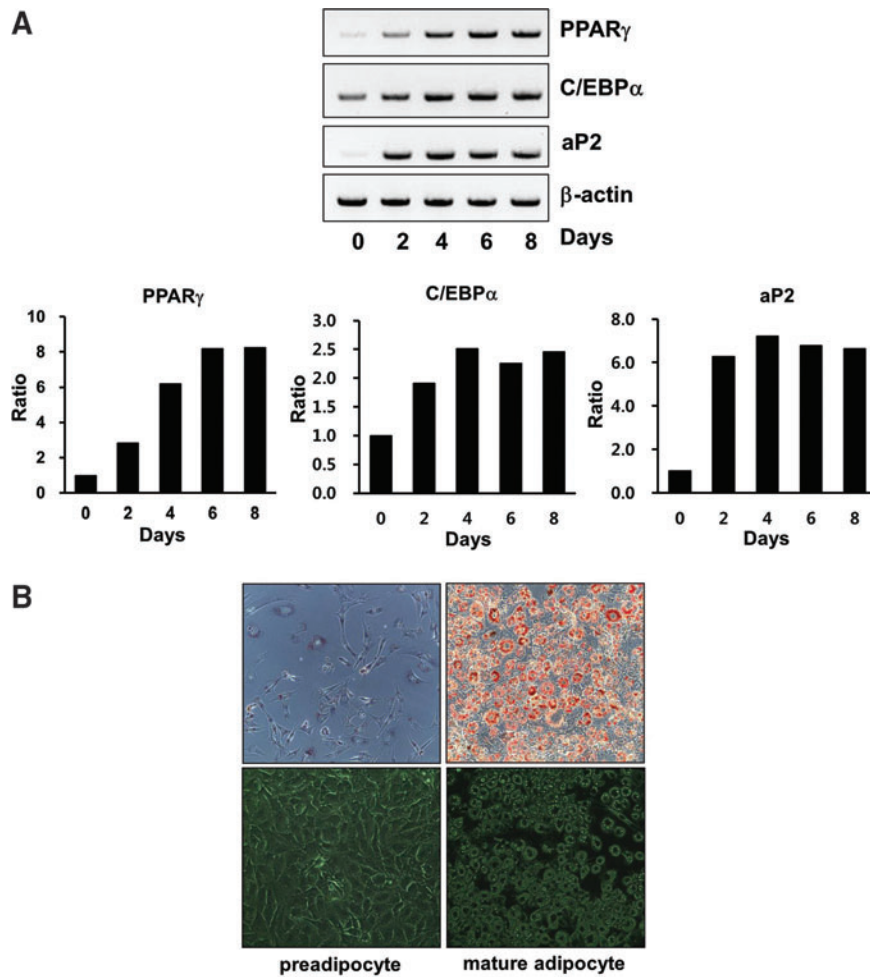

SUPPLEMENTARY FIG. S9. Differentiation of 3T3-L1 preadipocytes. (A) RT-PCR results of PPAR $\gamma$ , C/EBP $\alpha$ , and aP2 during 3T3-L1 differentiation.  $\beta$ -Actin was used as an internal control. (B) Representative picture of 3T3-L1 preadipocytes and mature adipocytes. The images were captured by EVOS<sup>TM</sup> light microscope. Lipid droplets were stained with Oil Red O.

SUPPLEMENTARY TABLE S1A. UPREGULATED PROTEINS IN MATURE 3T3-L1 ADIPOCYTES

| No.                                                                    | Score    | %Cov. | Mr       | pI  | Accession No. | Symbol | Protein Name                                                                             | Cellular Component   |
|------------------------------------------------------------------------|----------|-------|----------|-----|---------------|--------|------------------------------------------------------------------------------------------|----------------------|
| <i>Proteins that function in metabolism</i>                            |          |       |          |     |               |        |                                                                                          |                      |
| 19                                                                     | 2.40E+17 | 40    | 129685.7 | 6.3 | Q05920        | PYC    | Pyruvate carboxylase, mitochondrial precursor                                            | Mito                 |
| 20                                                                     | 1.01E+11 | 31    | 129685.7 | 6.3 | Q05920        | PYC    | Pyruvate carboxylase, mitochondrial precursor                                            | Mito                 |
| 21                                                                     | 160      | 7     | 129685.7 | 6.3 | Q05920        | PYC    | Pyruvate carboxylase, mitochondrial precursor                                            | Mito                 |
| 28                                                                     | 6.46E+03 | 24    | 47874.5  | 8.0 | Q9DBL1        | ACDSB  | Acyl-CoA dehydrogenase, short/branched chain specific, mitochondrial precursor           | Mito                 |
| 29                                                                     | 6.52E+05 | 36    | 43232.1  | 8.5 | P35486        | ODPA   | Pyruvate dehydrogenase E1 component alpha subunit, somatic form, mitochondrial precursor | Mito                 |
| 30                                                                     | 4.37E+03 | 23    | 102536.1 | 5.8 | O08528        | HXK2   | Hexokinase type II                                                                       | Mito                 |
| 31                                                                     | 129602   | 14    | 129685.7 | 6.3 | Q05920        | PYC    | Pyruvate carboxylase, mitochondrial precursor                                            | Mito                 |
| 34                                                                     | 7.25E+05 | 39    | 34216.7  | 5.9 | P14869        | RLA0   | 60S acidic ribosomal protein P0                                                          | Ribo                 |
| 35                                                                     | 4.89E+05 | 41    | 36346.3  | 6.2 | P14152        | MDHC   | Malate dehydrogenase, cytoplasmic                                                        | Cyto                 |
| 37                                                                     | 4.59E+10 | 61    | 38937.5  | 6.4 | Q9D051        | ODPB   | Pyruvate dehydrogenase E1 component beta subunit, mitochondrial precursor                | Mito                 |
| 38                                                                     | 3.07E+04 | 41    | 32667.4  | 5.4 | Q9D819        | IPYR   | Inorganic pyrophosphatase                                                                | Cyto                 |
| 39                                                                     | 112      | 10    | 35061    | 4.9 | Q8K1Z0        | COQ9   | Ubiquinone biosynthesis protein COQ9, mitochondrial precursor                            | Mito                 |
| 42                                                                     | 1.22E+05 | 59    | 29820.3  | 5.0 | P67778        | PHB    | Prohibitin                                                                               | Memb                 |
| 43                                                                     | 8.14E+04 | 61    | 27254.7  | 5.6 | Q9CQ60        | 6PGL   | 6-phosphogluconolactonase                                                                | Cyto                 |
| 45                                                                     | 9.31E+03 | 42    | 26000    | 6.1 | P47968        | RPIA   | Ribose-5-phosphate isomerase                                                             |                      |
| 55                                                                     | 3.67E+09 | 84    | 15137.6  | 6.1 | Q05816        | FABP5  | Fatty acid-binding protein, epidermal                                                    | Cyto                 |
| <i>Proteins that relate with proteasome</i>                            |          |       |          |     |               |        |                                                                                          |                      |
| 24                                                                     | 6.93E+03 | 16    | 61977    | 4.9 | Q8R317        | UBQL1  | Ubiquilin 1                                                                              | Cyto, Nu, Proteasome |
| 46                                                                     | 3.08E+05 | 65    | 22965.1  | 6.2 | Q9R1P1        | PSB3   | Proteasome subunit beta type 3                                                           | Cyto, Nu, Proteasome |
| <i>Proteins that function in chaperone/mediator of protein folding</i> |          |       |          |     |               |        |                                                                                          |                      |
| 22                                                                     | 1.20E+09 | 40    | 70871.6  | 5.4 | P63017        | HSP7C  | Heat shock cognate 71kDa protein                                                         | Cyto                 |
| 23                                                                     | 54       | 13    | 73483    | 5.9 | P38647        | GRP75  | Stress-70 protein, mitochondrial precursor                                               | Mito                 |
| 26                                                                     | 5.53E+04 | 34    | 60956    | 5.9 | P63038        | CH60   | 60kDa Heat shock protein, mitochondrial precursor                                        | Mito                 |
| 33                                                                     | 69       | 8     | 72377    | 5.1 | P20029        | GRP78  | 78kDa glucose-regulated protein precursor                                                | ER                   |
| <i>Proteins that act as transporter/channel</i>                        |          |       |          |     |               |        |                                                                                          |                      |
| 25                                                                     | 3.25E+03 | 23    | 54038.8  | 6.1 | Q8R180        | ERO1A  | ERO1-like protein alpha precursor                                                        | ER                   |
| 40                                                                     | 1.05E+07 | 48    | 32892.3  | 6.1 | Q99J99        | THTM   | 3-mercaptopyruvate sulfurtransferase                                                     | Cyto, Mito           |
| 44                                                                     | 1.79E+04 | 31    | 29758.4  | 5.4 | O88441        | MTX2   | Metaxin 2                                                                                | Mito                 |
| 50                                                                     | 5.57E+05 | 65    | 18618.4  | 5.5 | Q9DCX2        | ATP5H  | ATP synthase D chain, mitochondrial                                                      | Mito                 |
| <i>Proteins that act in oxido-reduction</i>                            |          |       |          |     |               |        |                                                                                          |                      |
| 41                                                                     | 2.50E+08 | 65    | 35440.3  | 8.4 | Q99L13        | 3HIDH  | 3-hydroxyisobutyrate dehydrogenase, mitochondrial precursor                              | Mito                 |

(continued)



SUPPLEMENTARY TABLE S1A. (CONTINUED)

| No.                                                   | Score    | %Cov. | Mr      | pI  | Accession No. | Symbol | Protein Name                                                      | Cellular Component |
|-------------------------------------------------------|----------|-------|---------|-----|---------------|--------|-------------------------------------------------------------------|--------------------|
| 47                                                    | 120      | 24    | 28109   | 7.2 | P20108        | PRDX3  | Thioredoxin-dependent peroxide reductase, mitochondrial precursor | Mito               |
| 49                                                    | 3.35E+04 | 56    | 28127.3 | 7.2 | P20108        | PRDX3  | Thioredoxin-dependent peroxide reductase, mitochondrial precursor | Mito               |
| 53                                                    | 2.78E+03 | 43    | 15811.6 | 6.0 | P08228        | SODC   | Superoxide dismutase [Cu-Zn]                                      | Cyto               |
| <i>Proteins that function in structural molecules</i> |          |       |         |     |               |        |                                                                   |                    |
| 52                                                    | 112      | 20    | 18417   | 6.4 | P18760        | COF1   | Cofilin-1                                                         | Cyto, CK, Nu       |
| 57                                                    | 490      | 55    | 41766   | 5.3 | P63260        | ACTG   | Alpha actin                                                       |                    |
| <i>Unknown</i>                                        |          |       |         |     |               |        |                                                                   |                    |
| 56                                                    | 3.82E+03 | 52    | 13645.8 | 6.4 | P70349        | HINT1  | Histidine triad nucleotide-binding protein 1                      | Cyto, Nu           |
| <i>No ID</i>                                          |          |       |         |     |               |        |                                                                   |                    |
| 27, 32, 36, 48, 51, 54                                |          |       |         |     |               |        |                                                                   |                    |

SUPPLEMENTARY TABLE S1B. DOWNREGULATED PROTEINS IN MATURE 3T3-L1 ADIPOCYTES

| No.                                             | Score    | %Cov. | Mr       | pI   | Accession No. | Symbol | Protein Name                                     | Cellular Component |
|-------------------------------------------------|----------|-------|----------|------|---------------|--------|--------------------------------------------------|--------------------|
| <i>Proteins that function in metabolism</i>     |          |       |          |      |               |        |                                                  |                    |
| 1                                               | 1.21E+04 | 20    | 106909.5 | 5.45 | Q8BGQ7        | SYAC   | Alanyl-tRNA synthetase                           | Cyto               |
| 2                                               | 1.21E+04 | 20    | 106909.5 | 5.45 | Q8BGQ7        | SYAC   | Alanyl-tRNA synthetase                           | Cyto               |
| 8                                               | 1.42E+03 | 26    | 39503    | 5.02 | Q9JHJ0        | TMOD3  | Tropomodulin-3                                   | Cyto, CK           |
| 10                                              | 649      | 43    | 28785.1  | 4.66 | P17918        | PCNA   | Proliferating cell nuclear antigen;Cyclin        | Nu                 |
| 13                                              | 7.87E+03 | 40    | 20678.6  | 5.25 | Q9CPU0        | LGUL   | Lactoylglutathione lyase                         |                    |
| <i>Proteins that relate with proteasome</i>     |          |       |          |      |               |        |                                                  |                    |
| 3                                               | 4.21E+10 | 38    | 80752.3  | 5.44 | Q9QUR6        | PPCE   | Prolyl endopeptidase                             | Cyto               |
| 6                                               | 1.23E+06 | 59    | 42809    | 5.46 | Q9WVJ2        | PSD13  | 26S Proteasome non-AT-Pase regulatory subunit 13 | Cyto, Nu, Memb     |
| <i>Proteins that act as transporter/channel</i> |          |       |          |      |               |        |                                                  |                    |
| 12                                              | 9.62E+06 | 57    | 26881.9  | 5.09 | Q9Z1Q5        | CLIC1  | Chloride intracellular channel protein 1         | Memb,Cyto, Nu      |
| <i>Unknown</i>                                  |          |       |          |      |               |        |                                                  |                    |
| 9                                               | 5.72E+09 | 59    | 35752.7  | 4.83 | P48036        | ANXA5  | Annexin A5                                       |                    |
| 11                                              | 4.77E+04 | 30    | 37280.2  | 5.56 | P10605        | CATB   | Cathepsin B precursor                            | Lys                |
| <i>No ID</i>                                    |          |       |          |      |               |        |                                                  |                    |
| 4, 5, 7, 14, 15, 16, 17, 18                     |          |       |          |      |               |        |                                                  |                    |

SUPPLEMENTARY TABLE S2. SEQUENCES OF PRIMERS

| <i>Gene name</i>     | <i>Forward</i>                | <i>Reverse</i>                |
|----------------------|-------------------------------|-------------------------------|
| <b>Mouse primers</b> |                               |                               |
| aP2                  | 5'-ACATGATCATCAGCGTTAATGGG-3' | 5'-TCATAACACATTCCACCACCAGC-3' |
| C/EBP $\alpha$       | 5'-GAACAGCAACGAGTACCGGTA-3'   | 5'-CCATGGCCTTGACCAAGGAG-3'    |
| PPAR $\gamma$        | 5'-GGTGAAACTCTGGGAGATTC-3'    | 5'-CAACCATTGGGTCAGCTCTT-3'    |
| PGC1 $\alpha$        | 5'-TCGATGTGTGCGCTTCTTGC-3'    | 5'-ACGAGAGCGCATCCTTTGG-3'     |
| mtTFA                | 5'-CGATTTTCCACAGAACAGCT-3'    | 5'-CCATCAGCTGACTTGGAGTT-3'    |
| mtDNA                | 5'-CCACTTCATCTTACCATTTA-3'    | 5'-ATCTGCATCTGAGTTTAATC-3'    |
| Nrf1                 | 5'-CAACAGGGAAGAAACGGAAA-3'    | 5'-GCACCACATTCTCCAAAGGT-3'    |
| Nrf2                 | 5'-CTCTCTGAACTCCTGGACGG-3'    | 5'-GGGTCTCCGTAATGGAAG-3'      |
| MnSOD                | 5'-CCGAGGAGAAGTACCACGAG-3'    | 5'-GCTTGATAGCCTCCAGCAAC-3'    |
| HO-1                 | 5'-CACGCATATAACCCGCTACCT-3'   | 5'-CCAGAGTGTTTCATTTCAGCA-3'   |
| Hsp60                | 5'-GTCCCTCACTCGCCGAGAC-3'     | 5'-GATGAGGAGCCAGTGCCCCGG-3'   |
| Prx1                 | 5'-CCAAGCGCACCATTGCTCAGGAT-3' | 5'-GAGCGGCAACGGGAAGATCG-3'    |
| Prx3                 | 5'-GCAGCTGCGGGAAGGTTGCT-3'    | 5'-TGCTGGGTGACAGCAGGGGT-3'    |
| Prx5                 | 5'-CCAAGGGAGCGCAGGTGGTG-3'    | 5'-GCCTTCTGCCTGGTGGGCTC-3'    |
| Adiponectin          | 5'- AGGAGCTGAAGGGCCACGGG -3'  | 5'- TGGGAACAGTGACGCGGGTC-3'   |
| PAI-1                | 5'-AGGGCTTCATGCCCACTTCTTCA-3' | 5'-AGTAGAGGGCATTACCAGCACCA-3' |
| Leptin               | 5'-GGGAGCACCGTGAAGGCTGC-3'    | 5'-CCTGGCTGACCCCCAAAGCC-3'    |
| FAS                  | 5'-CCTGGATAGCATTCCGAACCT-3'   | 5'-GCACATCTCGAAGGCTACACA-3'   |
| Lpl                  | 5'-GCCGCGTAGTTCAGCAGCA-3'     | 5'-CCCTCCTCGGAAGGCGGTCA-3'    |
| ATGL                 | 5'-CTCATTGCTGGCTGCGGCT-3'     | 5'-CCCAGTGACCAGCGCTGTG-3'     |
| HSL                  | 5'-TGGGGAGCTCCAGTCGGAAGAGG-3' | 5'-CATTAGACAGCCCGCTGCTG-3'    |
| MCAD                 | 5'-CAACTCAGAAAGCGGCTCA-3'     | 5'-ACTTGCGGGCAGTTGCTTG-3'     |
| CPT1a                | 5'-ACCACTGGCCGCATGTCAAG-3'    | 5'-AGCGAGTAGCGCATAGTCAT-3'    |
| $\beta$ -actin       | 5'-ACCCACACTGTGCCATCTA-3'     | 5'-GCCACAGGATTCCATACCCA-3'    |
| 18S                  | 5'-CGAAAGCATTGCCAAGAAT-3'     | 5'-AGTCGGCATCGTTTATGGTC-3'    |
| <b>Human primers</b> |                               |                               |
| Gpx3                 | 5'-TGAAATCCCAGCCGCTAGCGA-3'   | 5'-GCCACCGTCCGTCTGAGGTGT-3'   |
| Prx3                 | 5'-TGCCCGACATGTGAGTGCCAT-3'   | 5'-GCAGGTGCATGGCATGAGGAAGT-3' |
| mtDNA                | 5'-ACGACCTCGATGTTGGATC-3'     | 5'-GCTCTGCCATCTTAACAAACC-3'   |
| 28S                  | 5'-TTAAGGTAGCCAAATGCCTCG-3'   | 5'-CCTTGGCTGTGGTTTCGCT-3'     |
